# Supplementary material
Source: PubMed Central journal article supplement (PMC2361153)
Supplement: NIHMS44913-supplement-HMG_req__text.pdf [file NIHMS44913-supplement-HMG_req__text.pdf]

This is a pre-copy-editing, author-produced PDF of an article accepted for publication in Human Molecular Genetics following peer review. The definitive publisher-authenticated version (Sex-dependent association of a common low-density lipoprotein receptor polymorphism with RNA splicing efficiency in the brain and Alzheimer's disease. Hum Mol Genet. 2008 Apr 1;17(7):929-35) is available online at:  
<http://hmg.oxfordjournals.org/cgi/reprint/ddm365?ijkey=UzljRrqAR4T2GUg&keytype=ref>.
